# Supplementary material for: A Defective Interfering Influenza RNA Inhibits Infectious Influenza Virus Replication in Human Respiratory Tract Cells: A Potential New Human Antiviral
Source: MDPI journal article supplement (doi:10.3390/v8080237), 2016-08-22
Supplement: s1 [file s1]

# Supplementary Materials: A Defective Interfering Influenza RNA Inhibits Infectious Influenza Virus Replication in Human Respiratory Tract Cells: A Potential New Human Antiviral

Claire M. Smith, Paul D. Scott, Christopher O'Callaghan, Andrew J. Easton and Nigel J. Dimmock

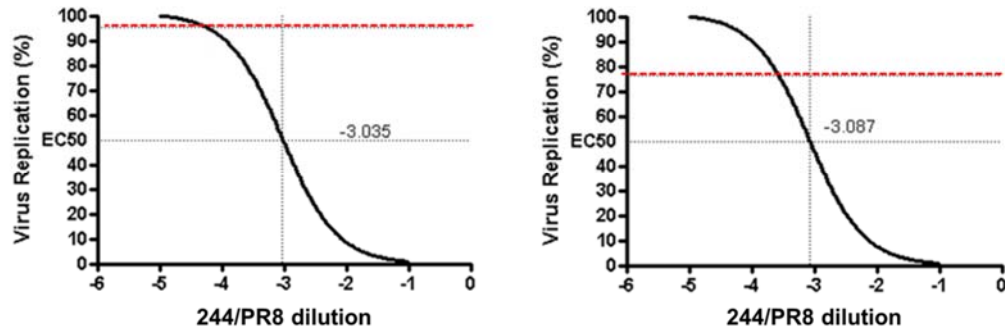

**Figure S1.** Determination of the EC<sub>50</sub> value for two independent assays of 244/PR8 DI virus in primary nasal basal cells. Dashed lines show the values for treatment of cells with the control UV inactivated 244/PR8 DI virus in the same assays.

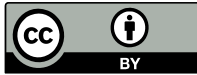

© 2016 by the author; licensee MDPI, Basel, Switzerland. This article is an open access article distributed under the terms and conditions of the Creative Commons Attribution (CC-BY) license (<http://creativecommons.org/licenses/by/4.0/>).
